# Supplementary figures and images for: A Randomized Controlled Trial of Illness Management and Recovery With an Active Control Group
Source: Atypon-hosted journal article supplement (doi:10.1176/appi.ps.201300354), 2014-04-15

**Figure 1. Study Flow Diagram**

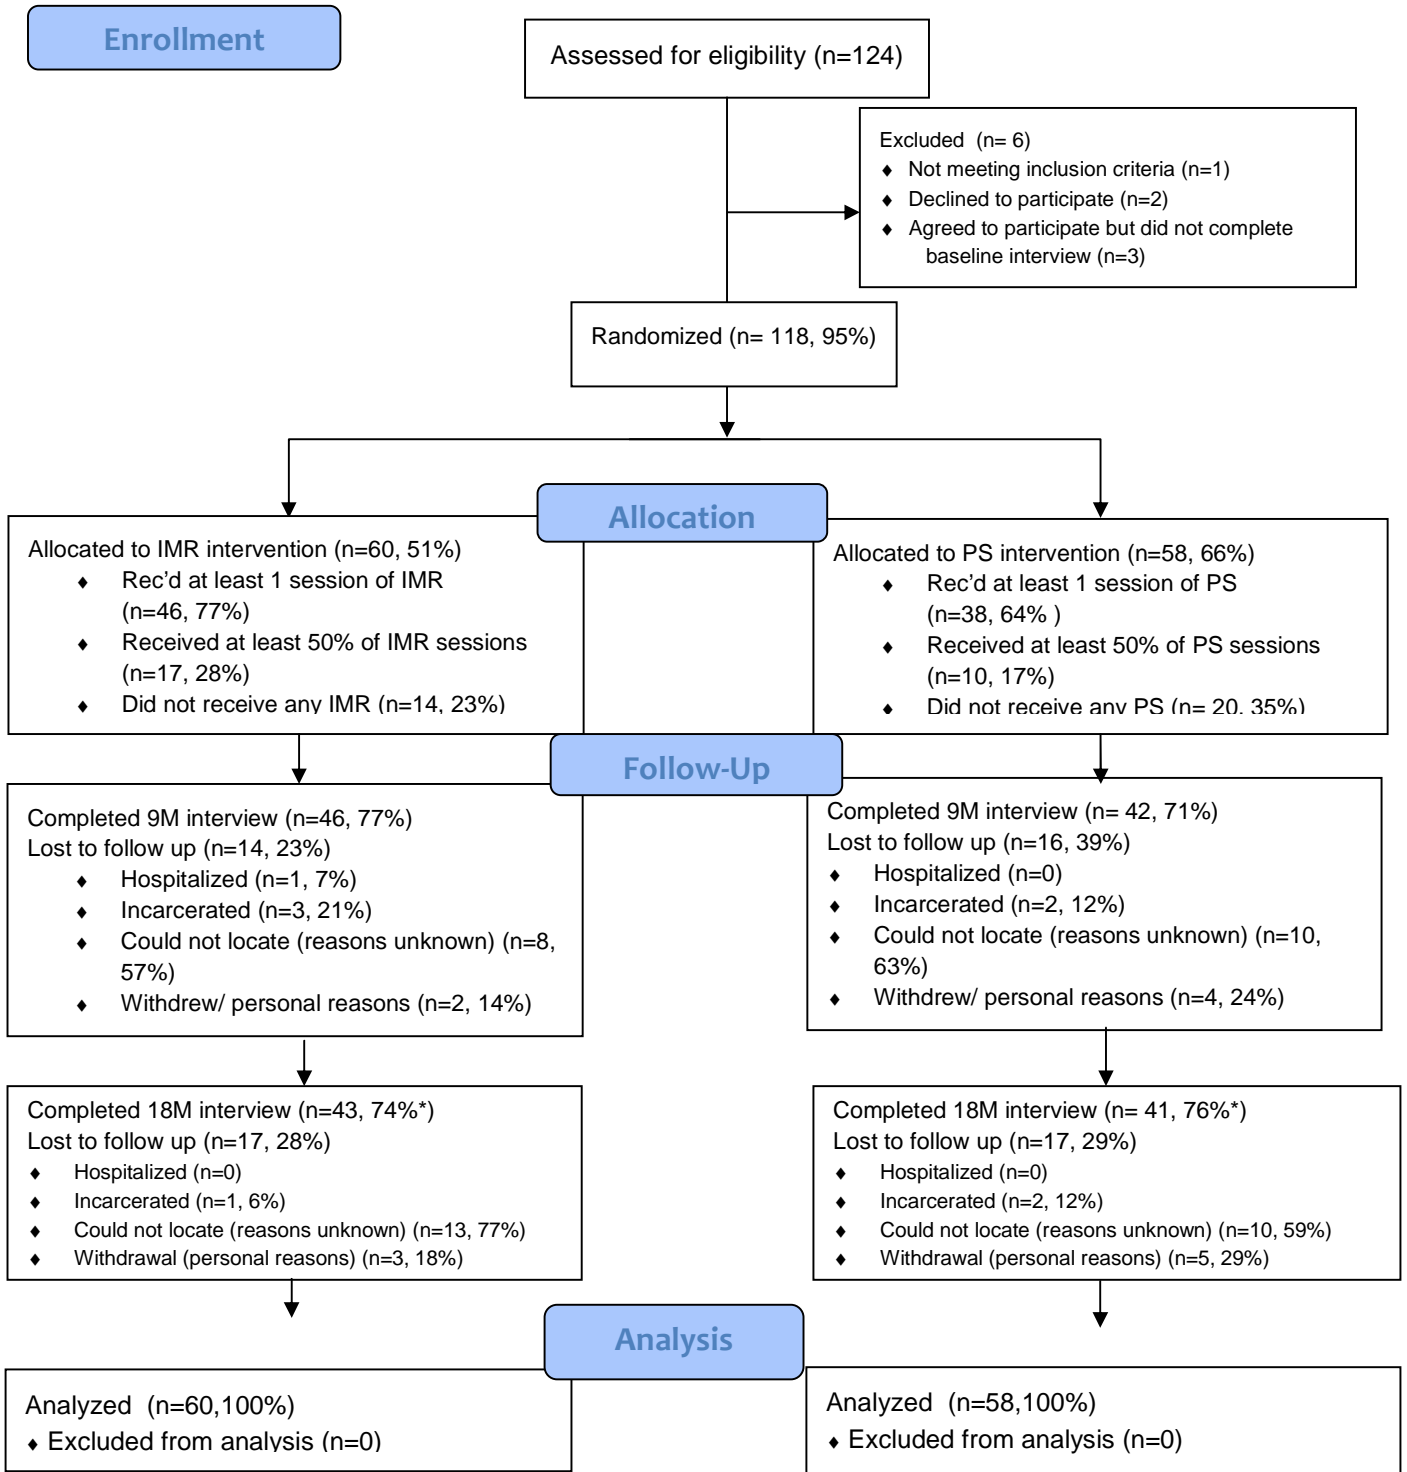

\*Percentage excludes withdrawals preceding 9M interviews

Supplement: 1005_ds001.pdf [file 1005_ds001.pdf]
